# Supplementary material for: An Exploratory Study of Kinase Activation Profiles in Hypoxic Human Cardiomyocytes Treated with Protective Extracellular Vesicles
Source: Research Square preprint supplement (doi:10.21203/rs.3.rs-8557214/v1), 2026-01-21
Supplement: Supplementary file 1 [file 690008495e4af6da0d83f22b.docx]

**Supplementary data**

**An Exploratory Study of Kinase Activation Profiles in Hypoxic Human Cardiomyocytes Treated with Protective Extracellular Vesicles**

Andreas Czosseck1, Barbara Szomolay2,3, Ali Sajid Imani4, Robert E. McCullumsmith 4,5, Patrick C.H. Hsieh6, Thierry Burnouf1,7, David J. Lundy1,7,8,*

**Affiliations**:

1. Graduate Institute of Biomedical Materials & Tissue Engineering, Taipei Medical University, 301 Yuantong Road, Yonghe District, New Taipei City, Taiwan 235603
2. Systems Immunity Research Institute, Cardiff University School of Medicine, Cardiff, United Kingdom
3. Division of Infection and Immunity, Cardiff University School of Medicine, Cardiff, United Kingdom
4. Department of Neuroscience and Psychiatry, College of Medicine and Life Sciences, University of Toledo, Toledo, Ohio 43614, USA
5. Neuroscience Institute, Promedica, Toledo, Ohio, USA
6. Institute of Biomedical Sciences, Academia Sinica, 128 Academia Road Section 2, Nangang, Taipei, Taiwan 115
7. International PhD Program in Biomedical Engineering, Taipei Medical University, 301 Yuantong Road, Yonghe District, New Taipei City, Taiwan 235603
8. Center for Cell Therapy, Taipei Medical University Hospital, 250 Wuxing Street, Xinyi District, Taipei, Taiwan 110

| Gene | Description | Forward | Reverse |
| --- | --- | --- | --- |
| MYH6 | Myosin heavy chain 6 (aMHC) | GGAAGACAAGGTCAACAGCCTG | TCCAGTTTCCGCTTTGCTCGCT |
| MYH7 | Myosin heavy chain 7 (bMHC) | GGAGTTCACACGCCTCAAAGAG | TCCTCAGCATCTGCCAGGTTGT |
| NPPA | Atrial Natriuretic Peptide (ANP) | ACAATGCCGTGTCCAACGCAGA | CTTCATTCGGCTCACTGAGCAC |
| ATP2A2 | SERCA2 / ATPase Sarcoplasmic/Endoplasmic Reticulum Ca2+ Transporting 2 | GGACTTTGAAGGCGTGGATTGTG | CTCAGCAAGGACTGGTTTTCGG |
| PPARGC1A/  PERM1 | PGC-1a / PPARGC1 and ESSR induced regulator, Muscle 1 | CCAAAGGATGCGCTCTCGTTCA | CGGTGTCTGTAGTGGCTTGACT |
| PPARA | Peroxisome Proliferator Activated Receptor Alpha (PPAR alpha) | TCGGCGAGGATAGTTCTGGAAG | GACCACAGGATAAGTCACCGAG |
| LPL | Lipoprotein lipase | CTGCTGGCATTGCAGGAAGTCT | CATCAGGAGAAAGACGACTCGG |
| ACAT1 | Acetyl-CoA Acetyltransferase 1 | CCAGCCACTAAGCTTGGTTCCA | GTAGGAGCTTGTCCTTCACCTC |
| DGAT1 | Diacylglycerol O-acyltransferase 1 | GCTTCAGCAACTACCGTGGCAT | CCTTCAGGAACAGAGAAACCACC |
| SCD | Stearoyl-CoA desaturase (delta-9-desaturase) | CCTGGTTTCACTTGGAGCTGTG | TGTGGTGAAGTTGATGTGCCAGC |
| ALDOA | Aldolase | GACACTCTACCAGAAGGCGGAT | GGTGGTAGTCTCGCCATTTGTC |
| HK1 | Hexokinase 1 | CTGCTGGTGAAAATCCGTAGTGG | GTCCAAGAAGTCAGAGATGCAGG |
| HK2 | Hekokinase 2 | GAGTTTGACCTGGATGTGGTTGC | CCTCCATGTAGCAGGCATTGCT |
| PGK1 | Phosphoglycerate kinase 1 | CCGCTTTCATGTGGAGGAAGAAG | CTCTGTGAGCAGTGCCAAAAGC |
| GAPDH | Glycerinaldehyde-3-phosphat-Dehydrogenase | GTCTCCTCTGACTTCAACAGCG | ACCACCCTGTTGCTGTAGCCAA |

**Supplementary Table 1: List of primers used in the study**


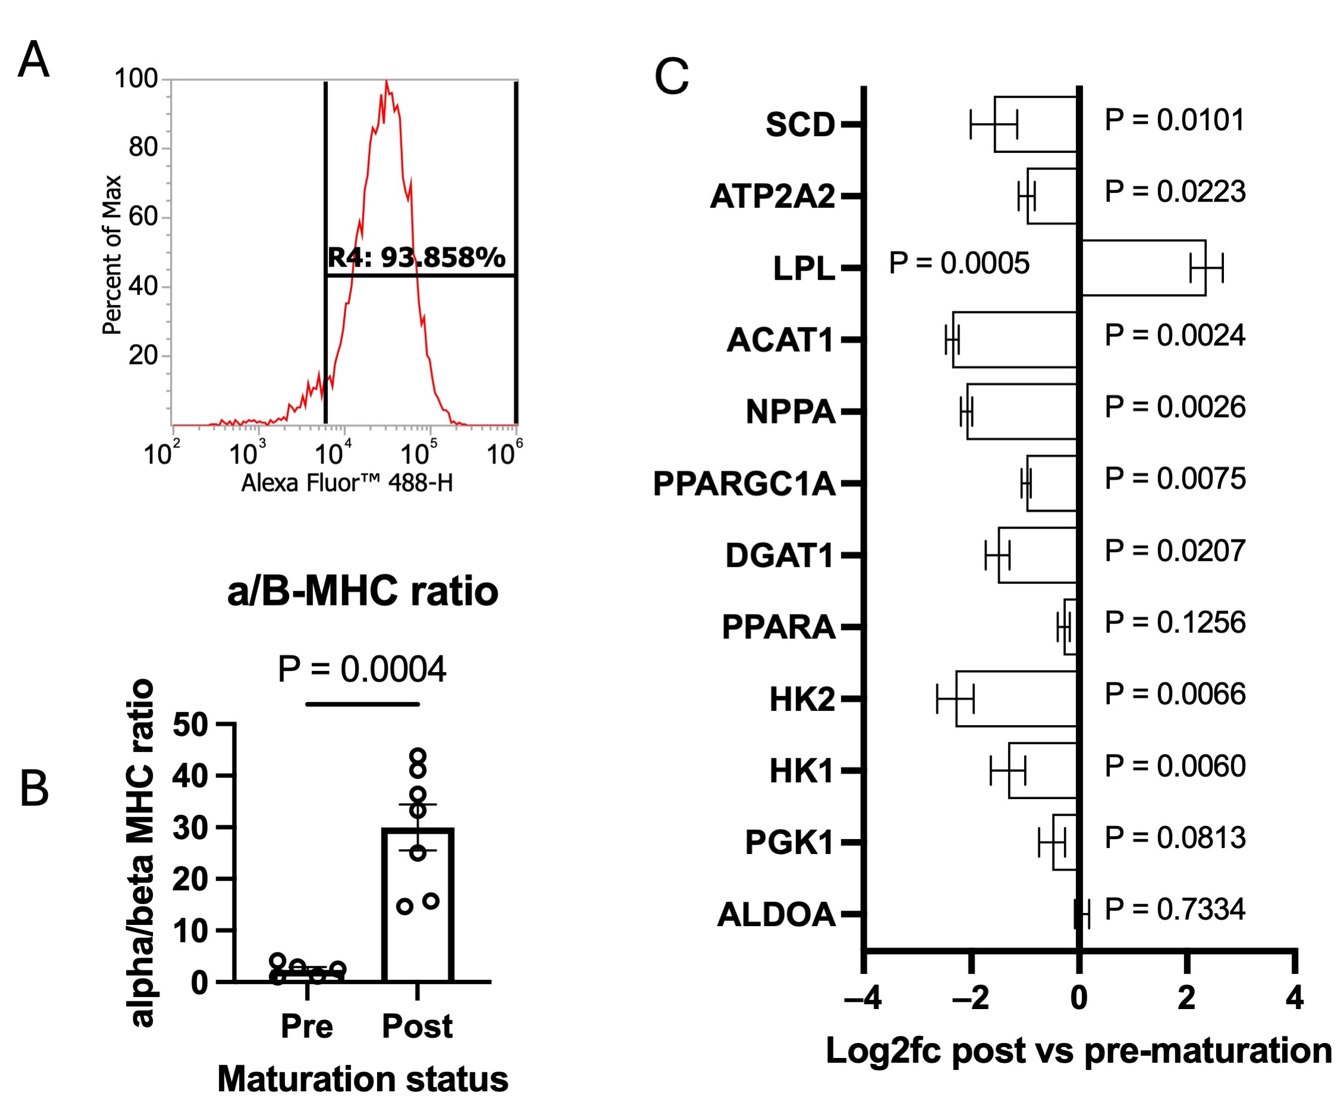


**Supplemental Figure 1:**

1. Flow cytometry of the induced pluripotent stem cell-derived cardiomyocyte (iCM) population used in the study. Cells were stained for cardiac troponin I labelled with AF488. The gate threshold was set based on isotype control-stained cells.
2. Gene expression level of alpha/beta myosin heavy chain (MHC) ratio, comparing pre vs. post maturation. N = 7 samples per group. Compared by unpaired t-test.
3. Additional qPCR panel showed expression of glycolytic enzymes, fatty acid synthesis enzymes, fetal CM markers and maturation markers. X axis shows log2fc compared to pre-maturation iCMs. P values are based on one-sample t-tests compared to log2fc = 0.


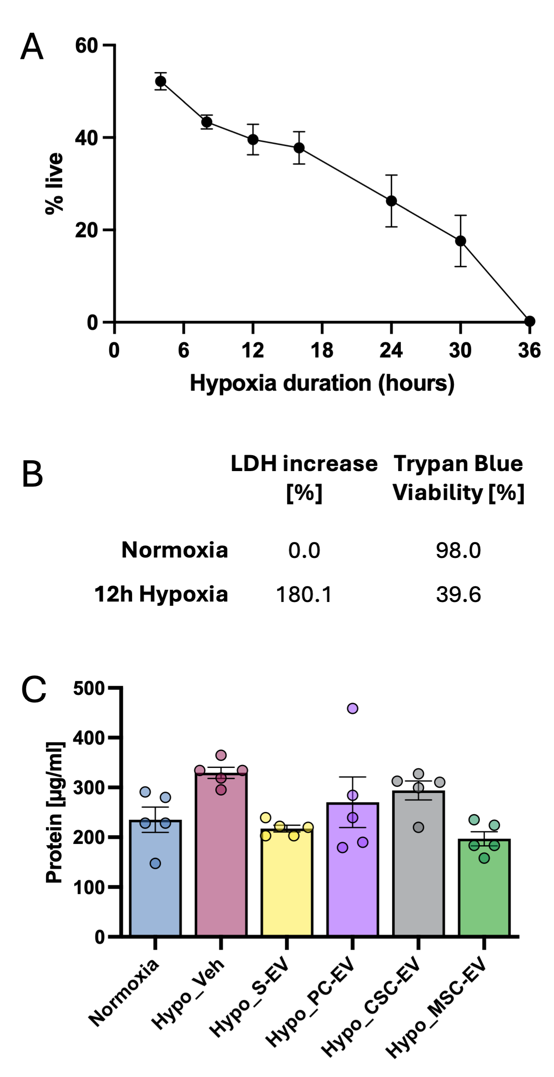


**Supplemental Figure 2**

1. Graph showing iCM viability over time during hypoxia from 4h to 36h. Each data point shows the mean of n = 4 independent samples. Error bars show SEM.
2. Quantification of LDH release and cell viability under normoxic and 12h hypoxic conditions. The LDH increase % is based on a comparison to normoxic cell basal LDH release. Trypan blue is based on the % of positively stained cells.
3. Total protein concentrations of each group following hypoxia exposure. All groups were compared by one-way ANOVA with Tukey’s post-test and the lowest three P values are shown. The comparisons not shown were P > 0.05.


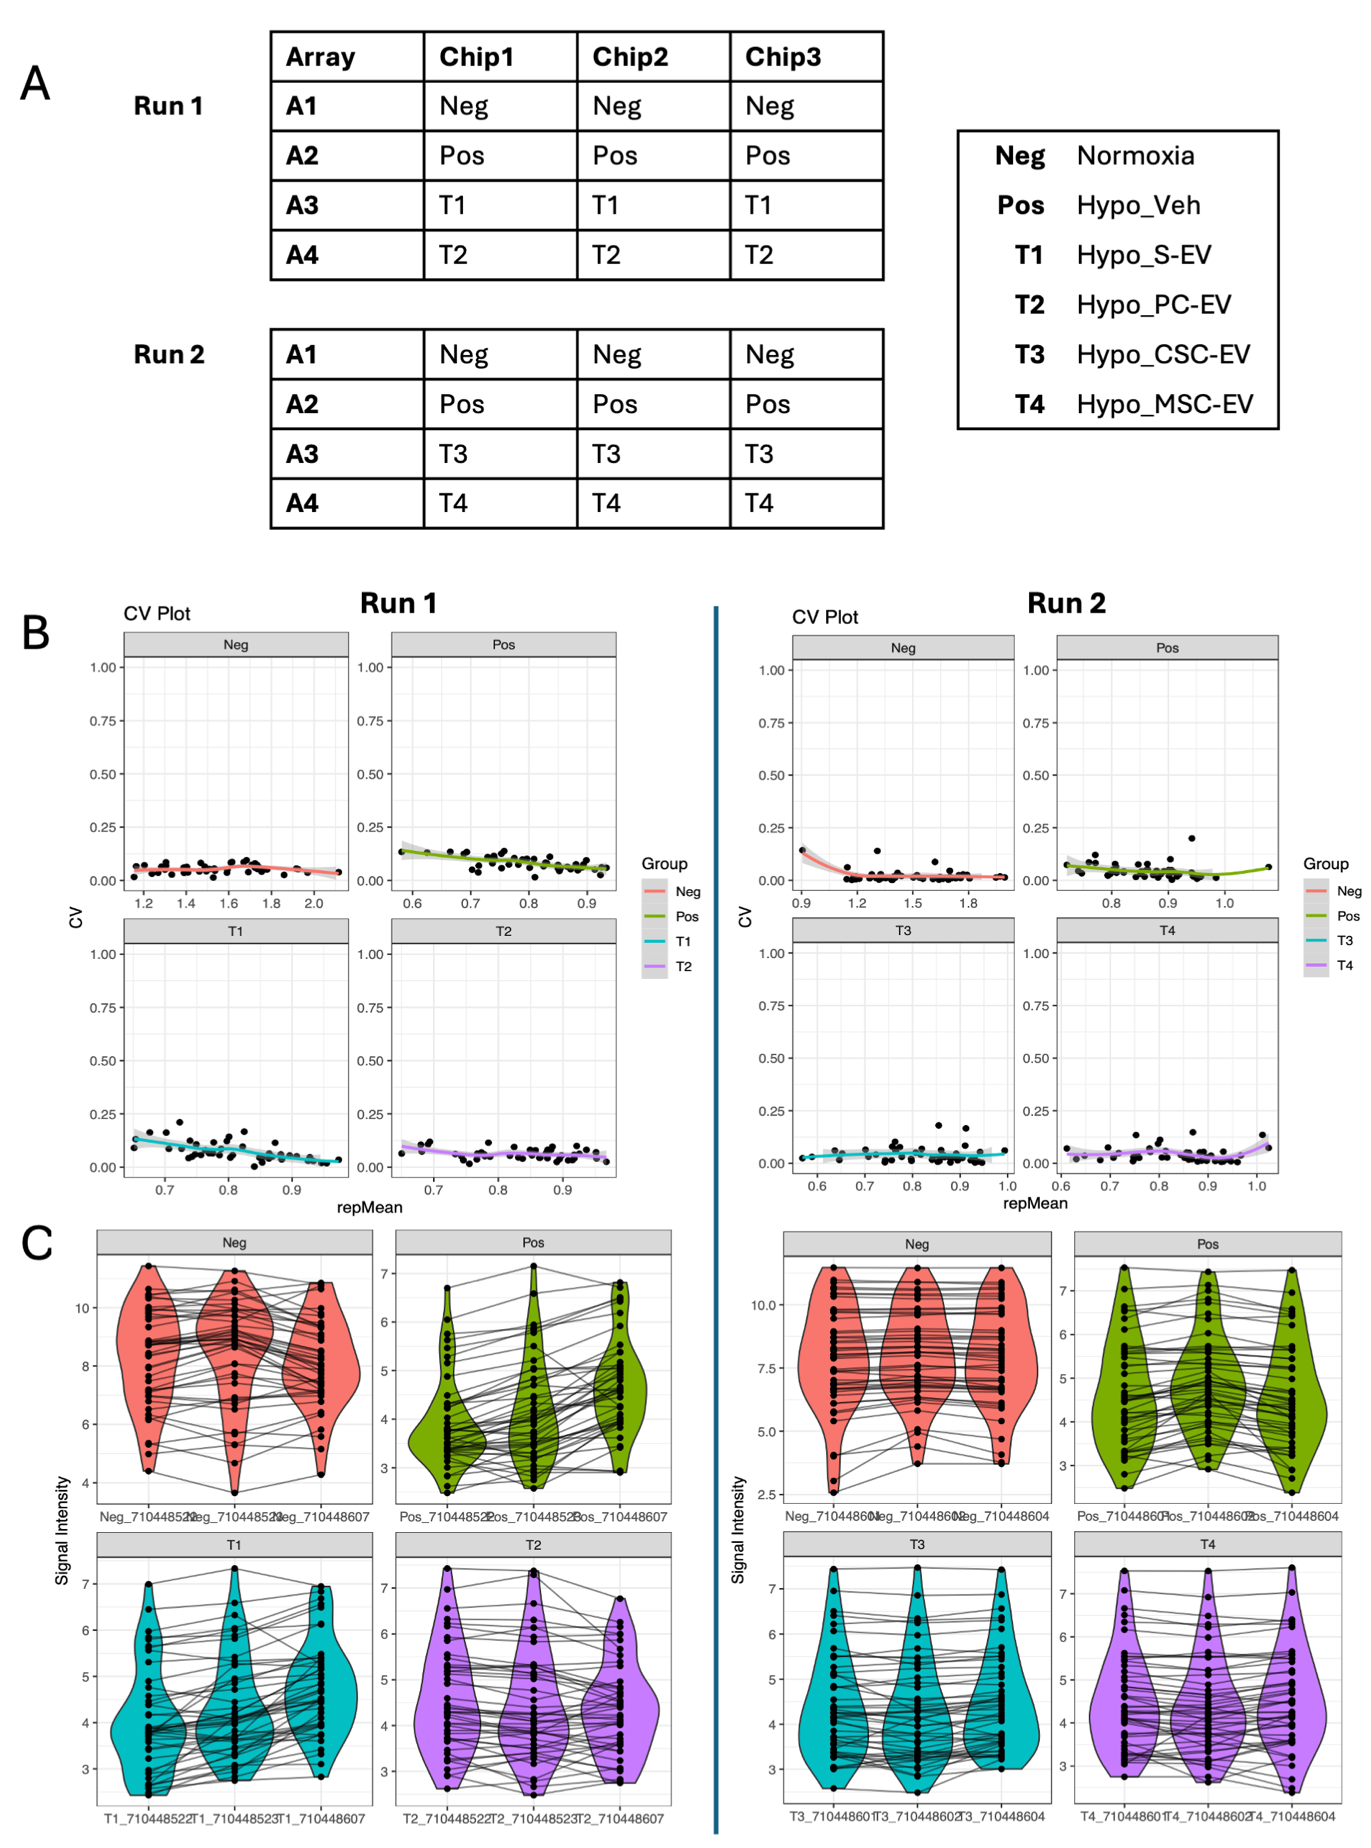


**Supplemental Figure 3**

1. Tables showing the layout of 24 total samples across 6 chips, carried out over two separate experimental runs. Sample labeling is indicated, with neg representing healthy normoxic cells, pos representing hypoxic cells with vehicle control, and T1-4 representing hypoxia combined with EV treatments.
2. Coefficient of variation (CV) % values for each experimental group. Left; run 1, right; run 2.
3. Violin plots of signal intensity distribution across groups for all replicates. Left; run 1, right: run 2.


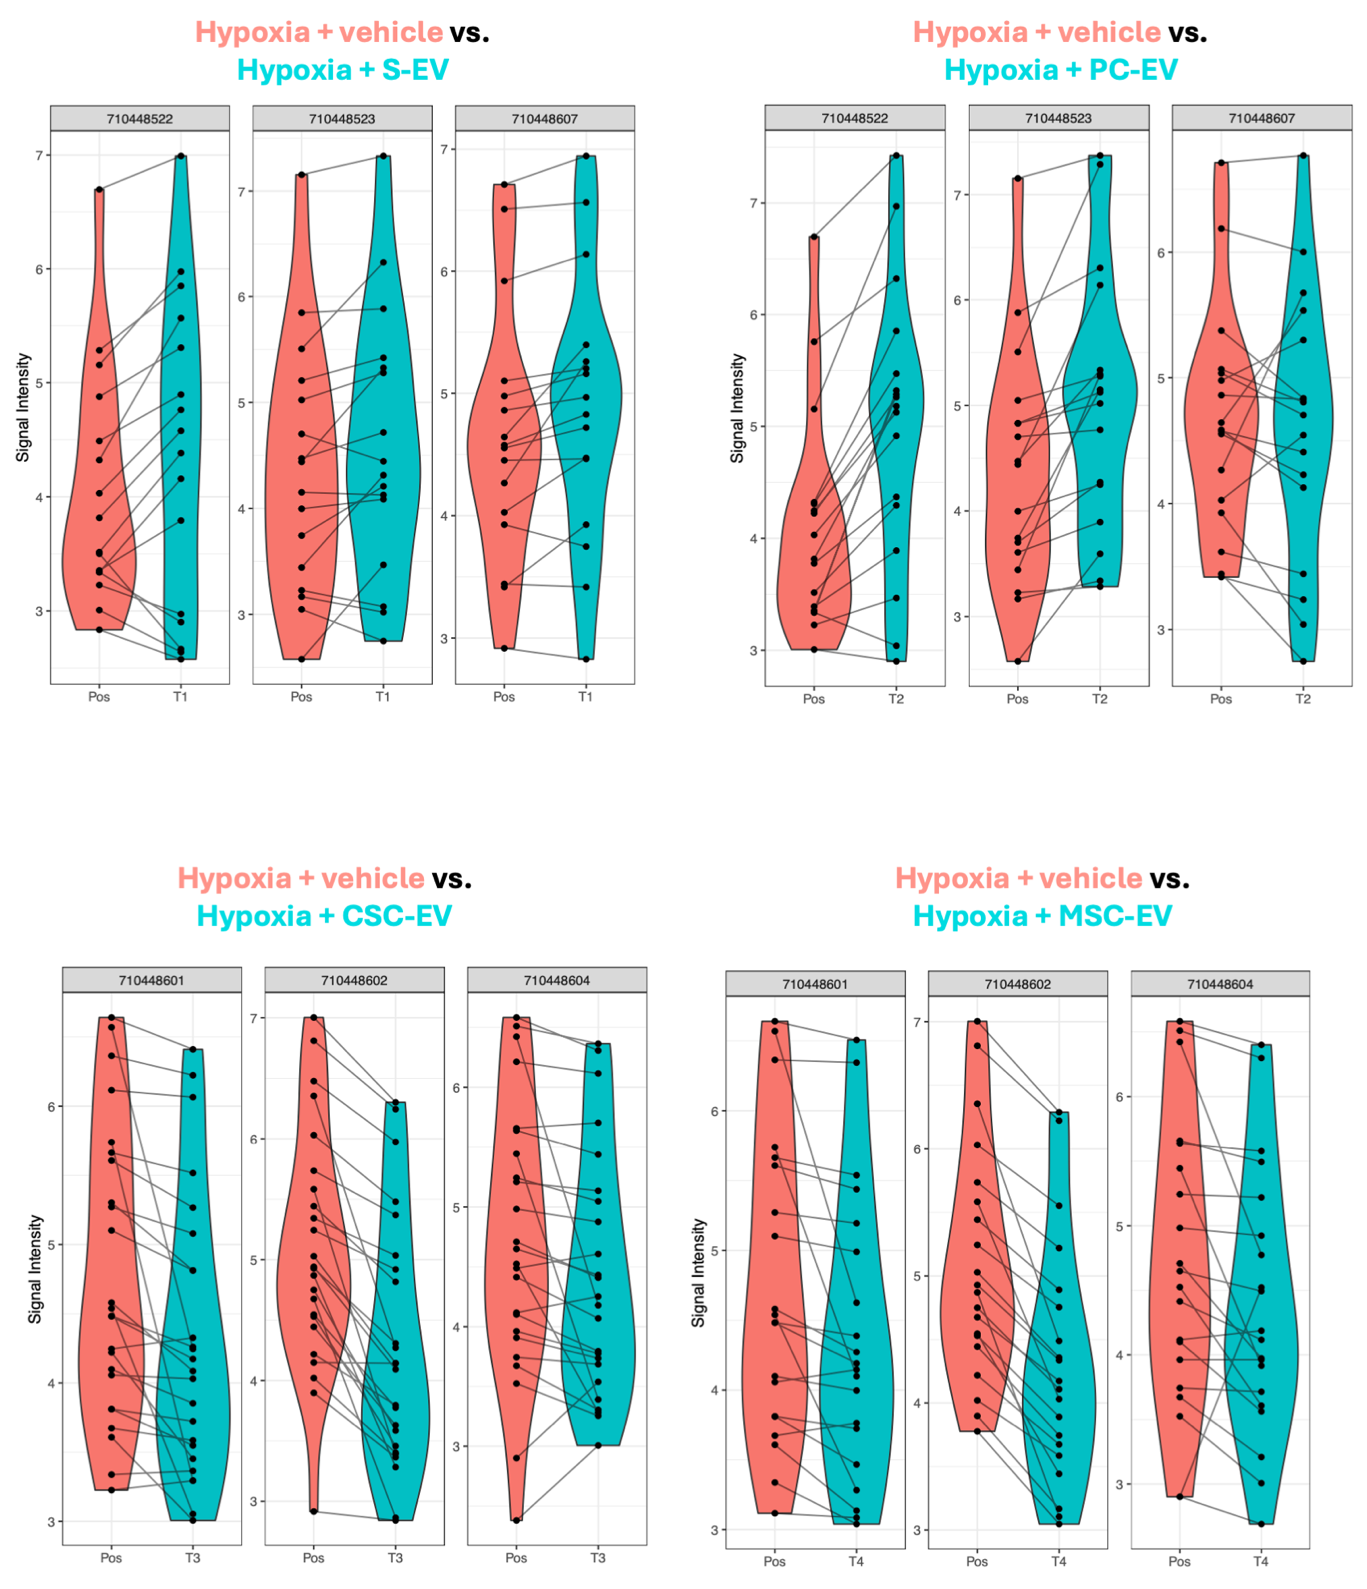


**Supplemental Figure 4**

Violin plots for hypoxia + vehicle vs. each EV treatment group.
